# Supplementary material for: Regulation of yak longissimus lumborum energy metabolism and tenderness by the AMPK/SIRT1 signaling pathways during postmortem storage
Source: PubMed Central journal article supplement (PMC9704559; doi:10.1371/journal.pone.0277410), 2022-11-28

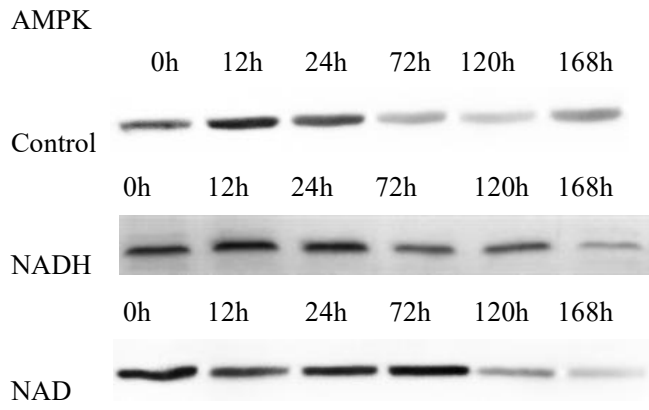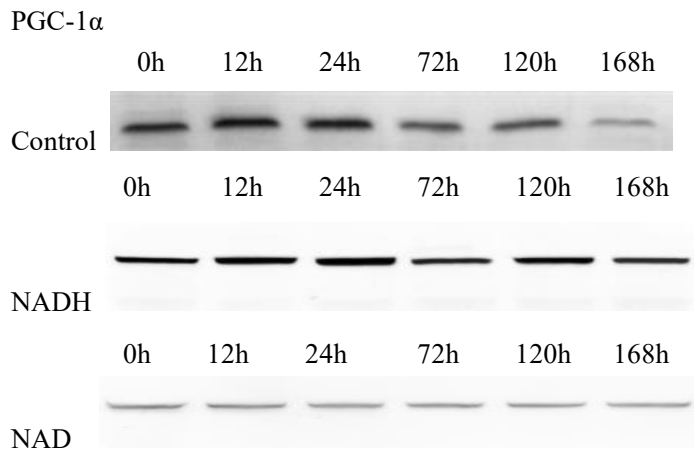

Supplement: pone.0277410.s001.pdf [file pone.0277410.s001.pdf]
